# Supplementary material for: Nuclear m6A reader YTHDC1 promotes muscle stem cell activation/proliferation by regulating mRNA splicing and nuclear export
Source: eLife journal article supplement (doi:10.7554/elife.82703), 2023-03-09

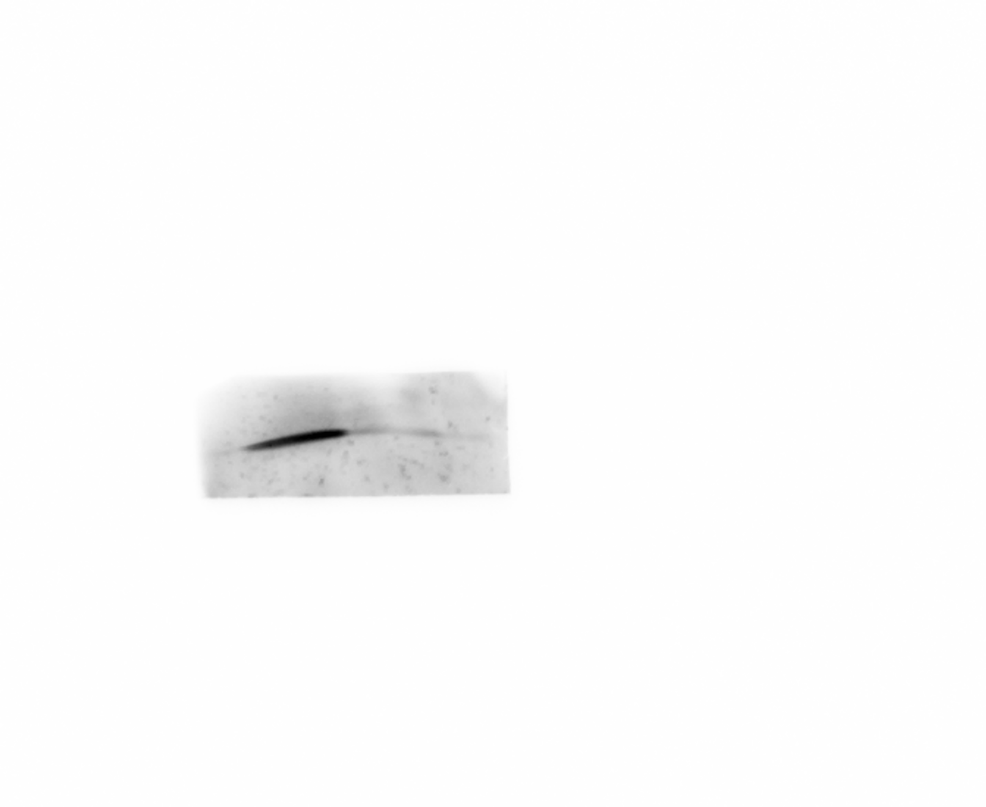
Figure 1G-Histone H3

**Nuc Cyto**


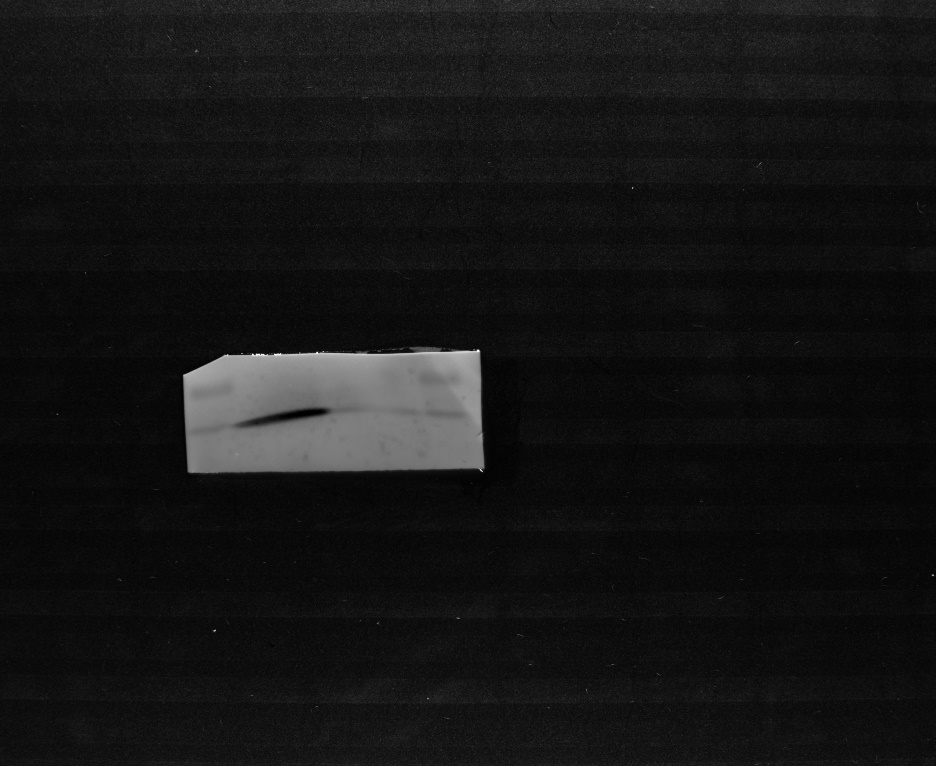


**15kDa marker**

**Histone H3**

**Nuc Cyto**

**Histone H3**


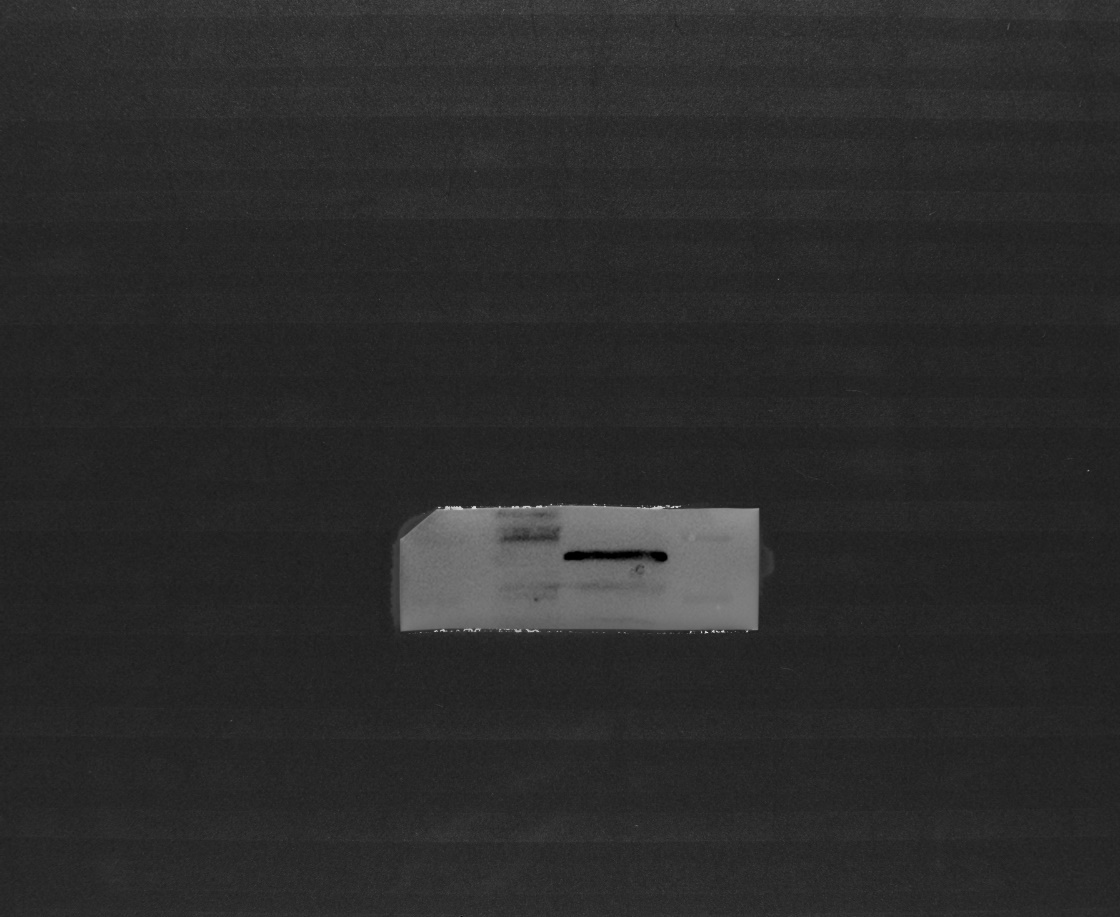
Figure 1G-tublin

**60kDa marker**

**tublin**

**Nuc Cyto**

Figure 1G YTHDC1

**100kDa marker**

**Nuc Cyto**

**YTHDC1**


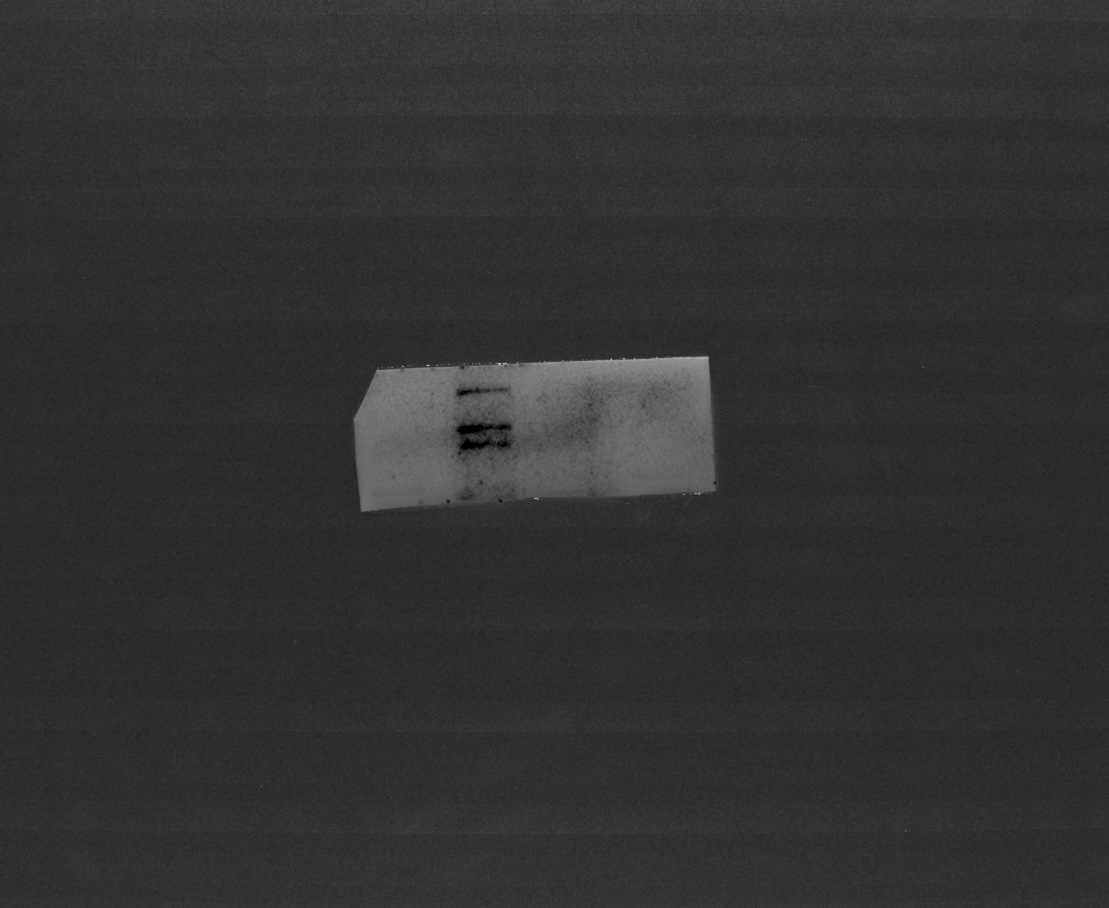

Supplement: fig1-data2 [file Figure 1G-with all relevant bands labelled.docx]
