# Supplementary material for: Nuclear m6A reader YTHDC1 promotes muscle stem cell activation/proliferation by regulating mRNA splicing and nuclear export
Source: eLife journal article supplement (doi:10.7554/elife.82703), 2023-03-09
Supplement: fig3-figsupp1-data1 [file Figure 3-supplement-1C-with all relevant bands labelled.docx]

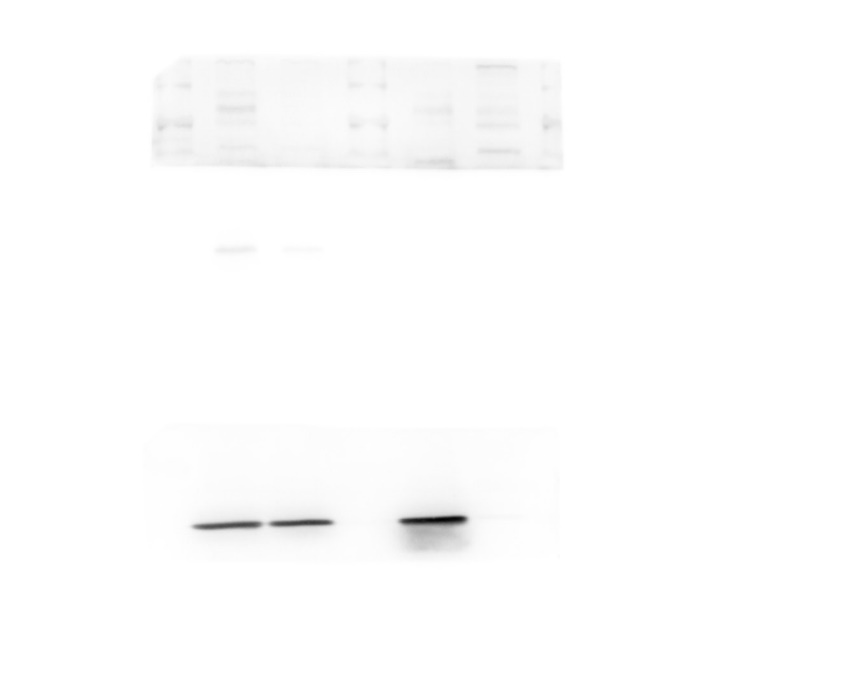
Figure3-supplement-1C-Histone H3

**15kDa**

**Histone H3**

**Ctrl iKO**


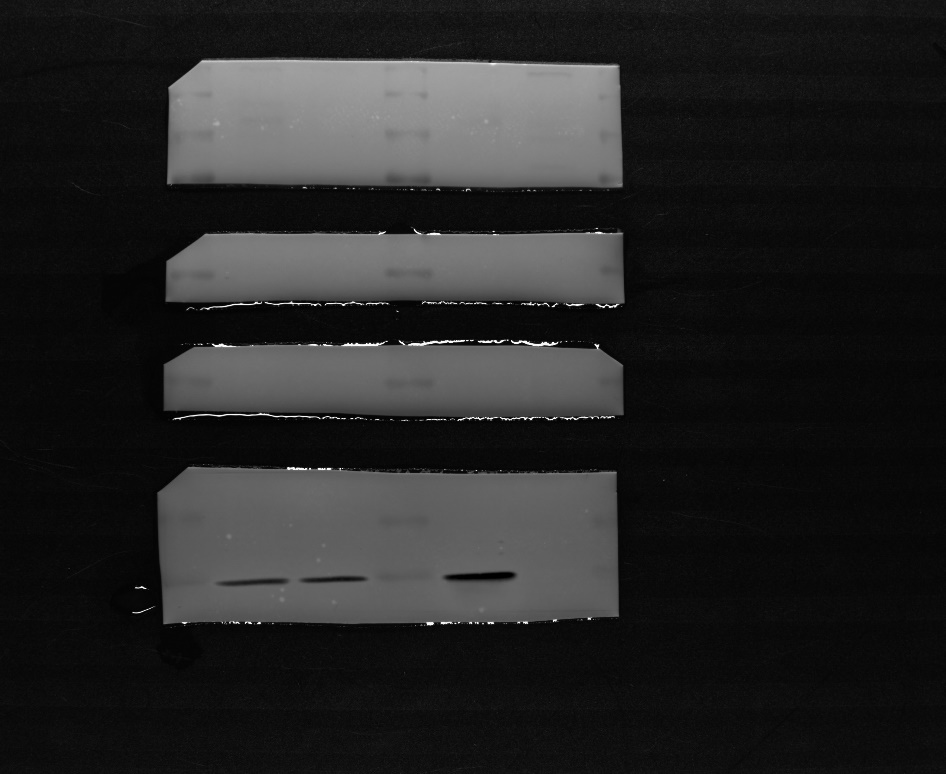


**15kDa**

**Ctrl iKO**

**Histone H3**


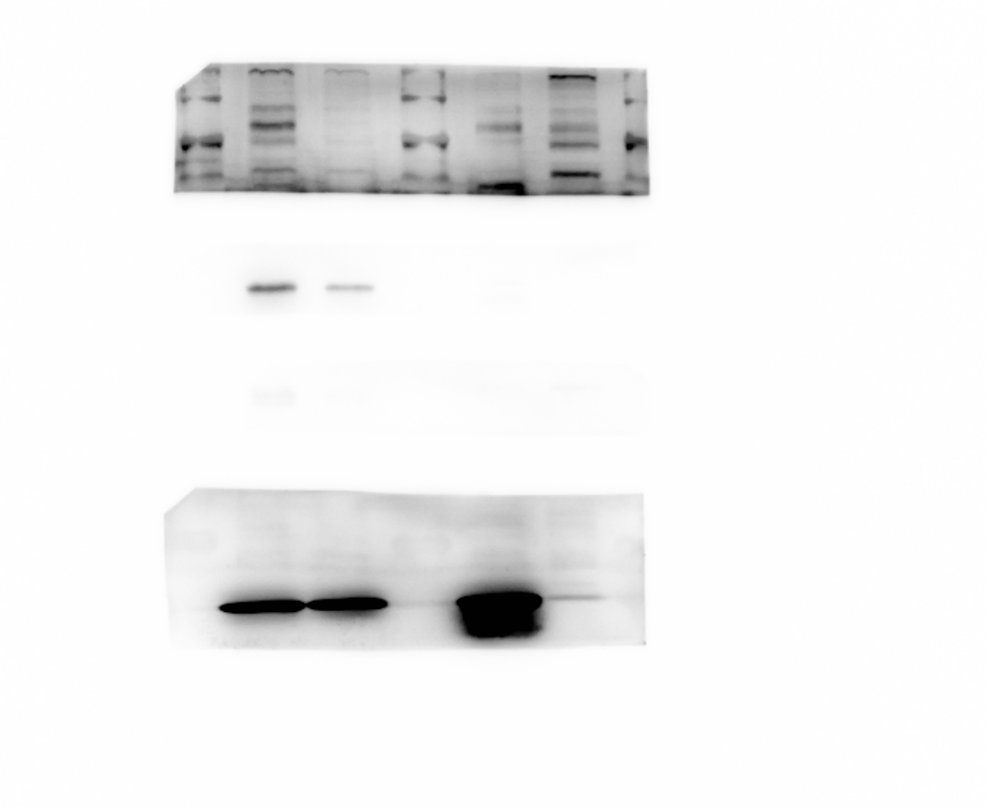
Figure3-supplement-1C-YTHDC1andPax7

**60kDa**

**Pax7**

**100kDa**

**Ctrl iKO**

**YTHDC**

Figure3-supplement-1C-Myod
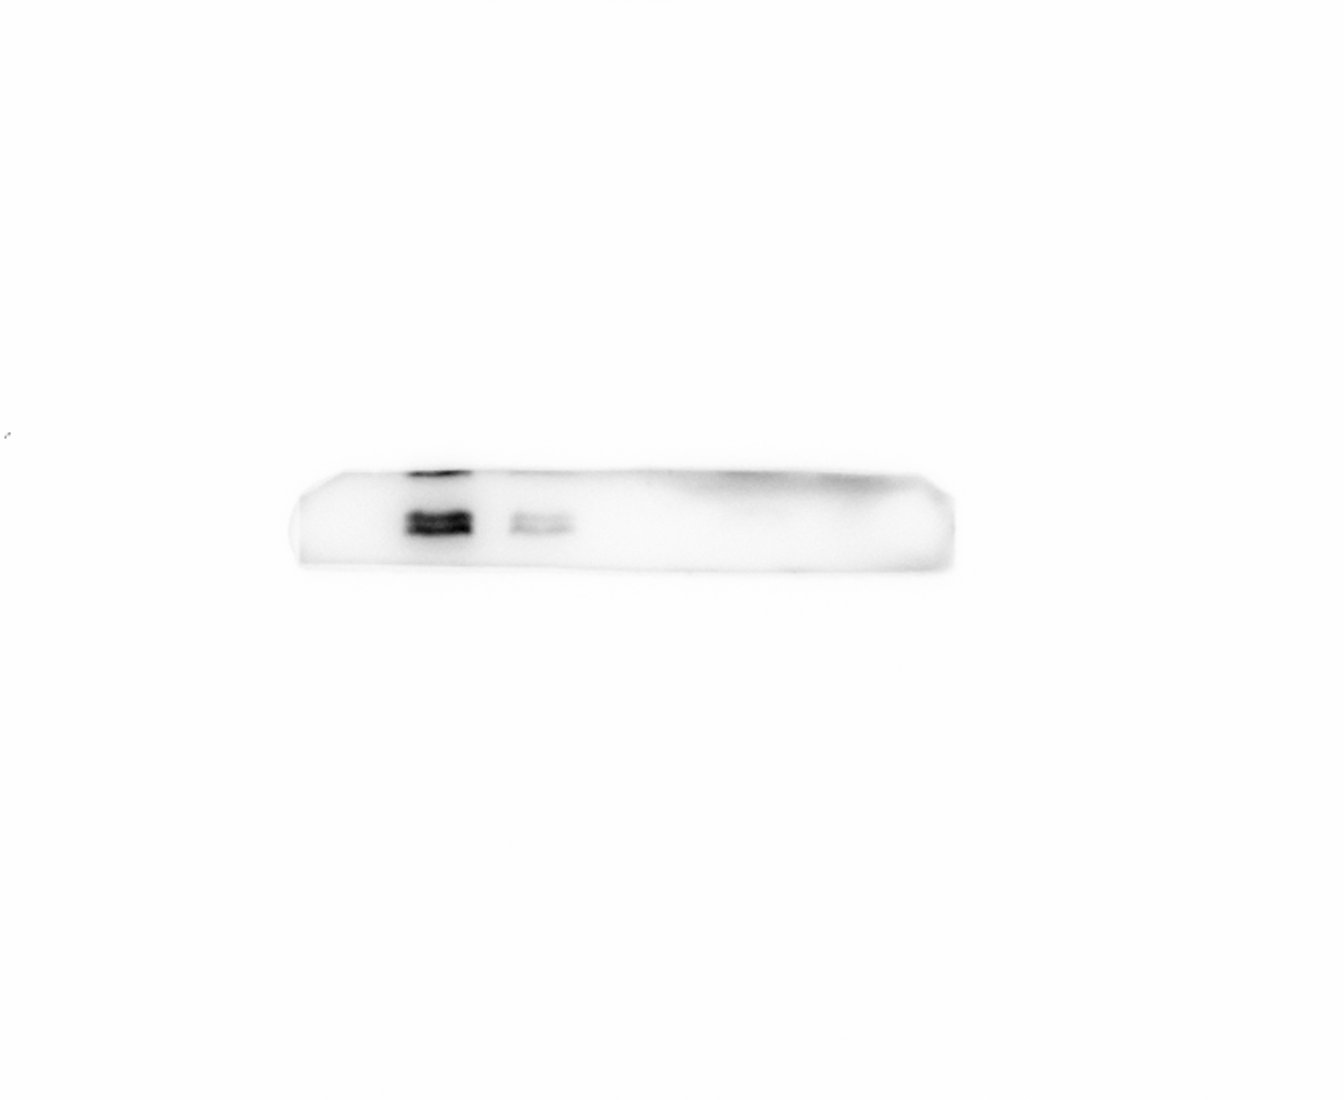


**Myod**

**Ctrl iKO**

**45kDa**
