# Supplementary material for: Nuclear m6A reader YTHDC1 promotes muscle stem cell activation/proliferation by regulating mRNA splicing and nuclear export
Source: eLife journal article supplement (doi:10.7554/elife.82703), 2023-03-09
Supplement: fig7-data1 [file Figure 7B-with all relevant bands labelled.docx]

Figure 7B-Anti-Flag





**pRK5-Flag-YTHDC1**

**pRK5**

**Anti-Flag**

Merged with marker


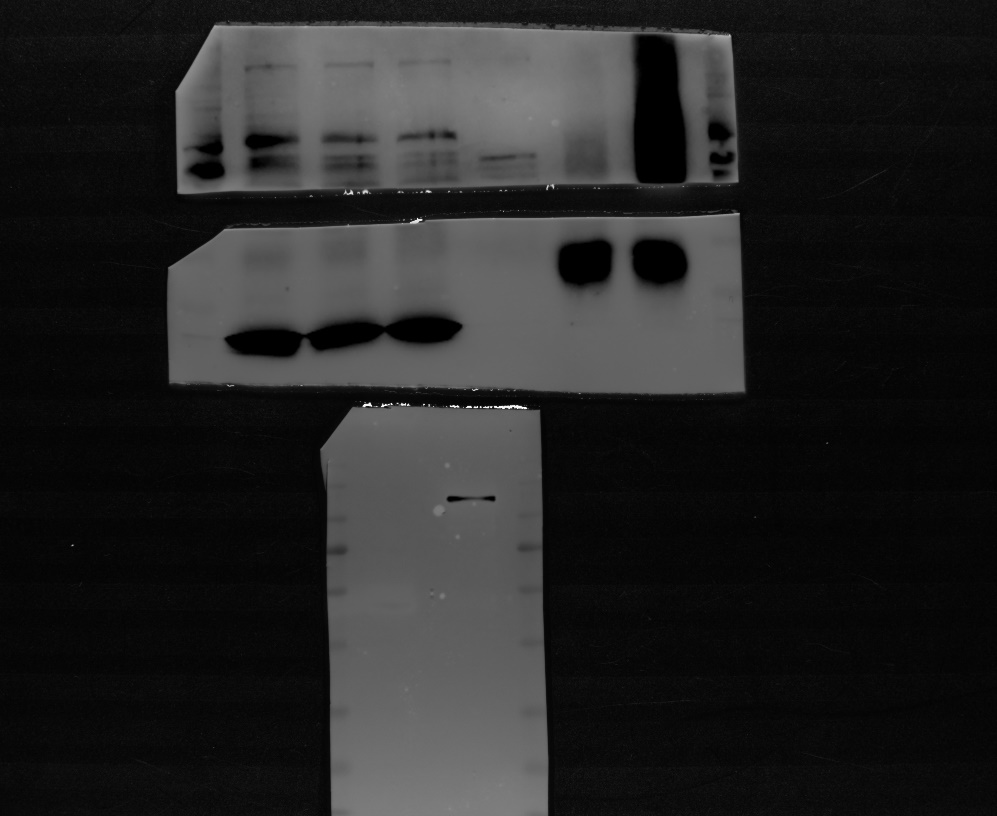


**pRK5-Flag-YTHDC1**

**100kDa**

**Anti-Flag**

**pRK5**
