# Supplementary material for: Nuclear m6A reader YTHDC1 promotes muscle stem cell activation/proliferation by regulating mRNA splicing and nuclear export
Source: eLife journal article supplement (doi:10.7554/elife.82703), 2023-03-09
Supplement: fig7-data1 [file Figure 7H-with all relevant bands labelled.docx]

Figure 7H-IP with flag-beads

**IP:pRK5-flagYTHDC1**

**Input: pRK5-flagYTHDC1**

**Input:pRK5-vector**

**Anti-YTHDC1**

**Anti-hnRNPG**

**IP:pRK5-vector**





**IP:pRK5-flagYTHDC1**

**Input: pRK5-flagYTHDC1**

**IP:pRK5-vector**

**Input:pRK5-vector**

**Anti-YTHDC1**

**Anti-hnRNPG**

Merged with marker


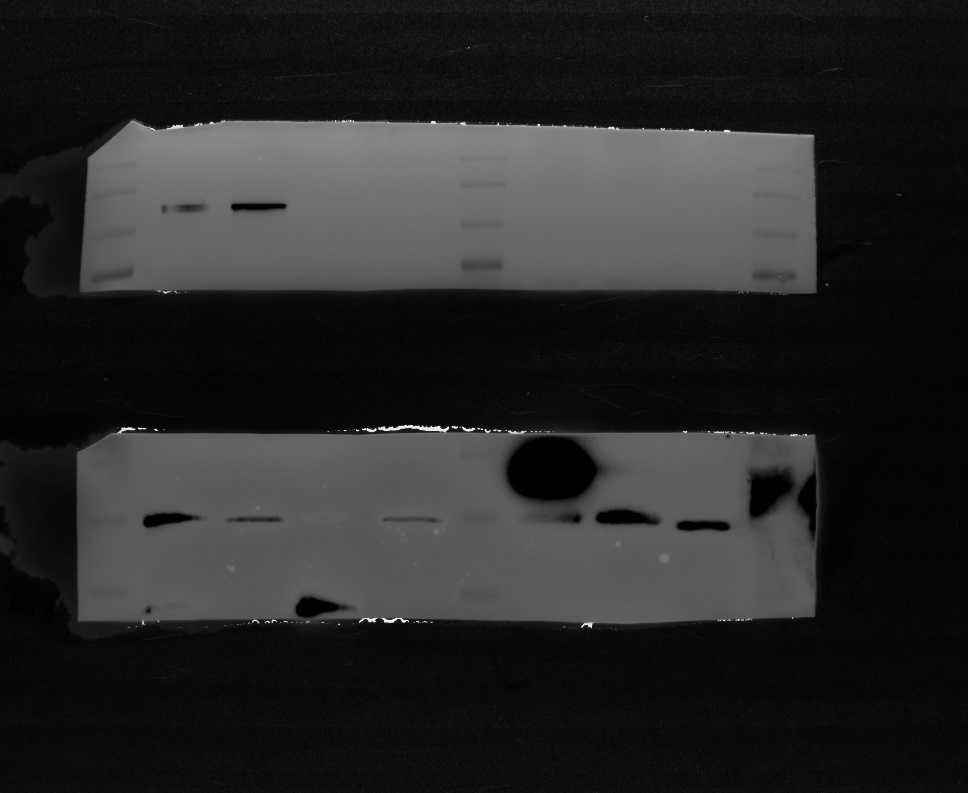


**45kDa**

**100kDa**
