# Supplementary material for: Nuclear m6A reader YTHDC1 promotes muscle stem cell activation/proliferation by regulating mRNA splicing and nuclear export
Source: eLife journal article supplement (doi:10.7554/elife.82703), 2023-03-09
Supplement: fig7-data2 [file Figure 7I-with all relevant bands labelled.docx]

**Figure 7I-C2C12 endogenous IP-anti YTHDC1**

**Input**

**IP:YTHDC1**

**IP:IgG**

**100kDa**


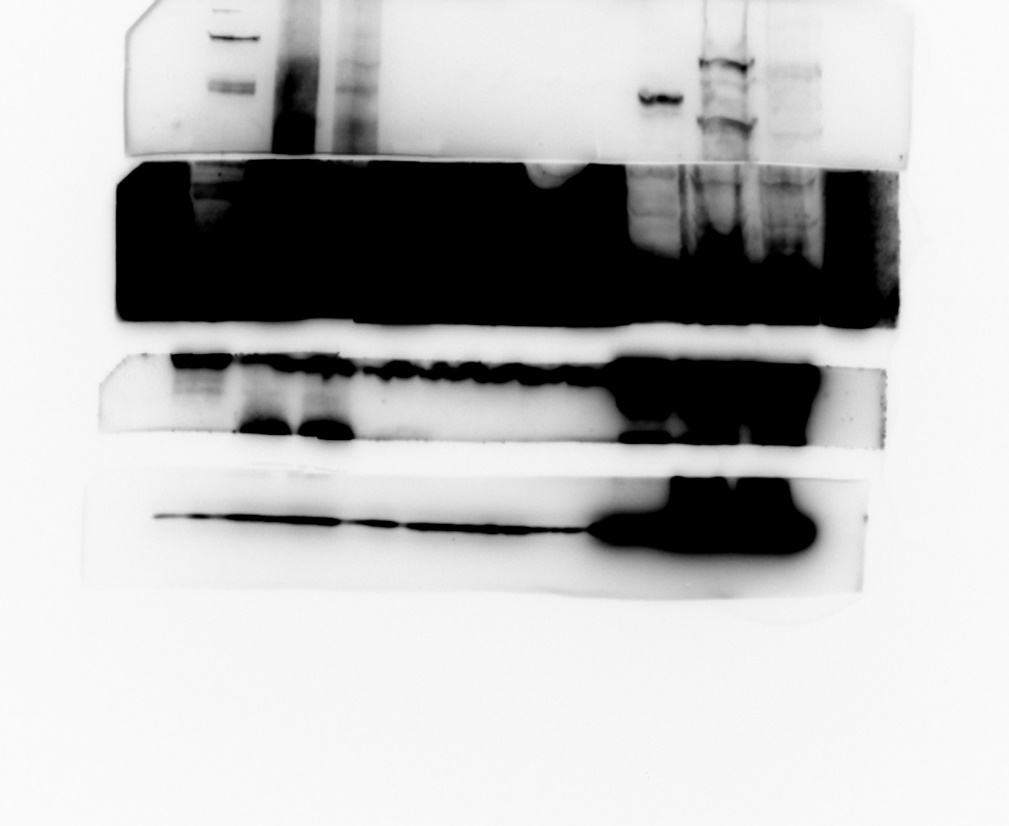


**Anti-YTHDC1**

Figure 7I-C2C12 endogenous IP-anti YTHDC1





**Arrow indicates Rabbit IgG**

**45kDa**

**Anti-hnRNPG**

**IP:IgG**

**IP:YTHDC1**

**Input**
