# Supplementary material for: Nuclear m6A reader YTHDC1 promotes muscle stem cell activation/proliferation by regulating mRNA splicing and nuclear export
Source: eLife journal article supplement (doi:10.7554/elife.82703), 2023-03-09
Supplement: fig7-data2 [file Figure 7J-with all relevant bands labelled.docx]

**Figure 7J-Co-IP of hnRNPG and YTHDC1 in 293T cells overexpressing hnRNPG and YTHDC1**





**IP:hnRNPG**

**Input**

**IP:YTHDC1**

**IP:IgG**

**Input**

**IP:IgG**

**Anti-YTHDC1**

**Anti-hnRNPG**

**Arrow indicates Rabbit IgG**


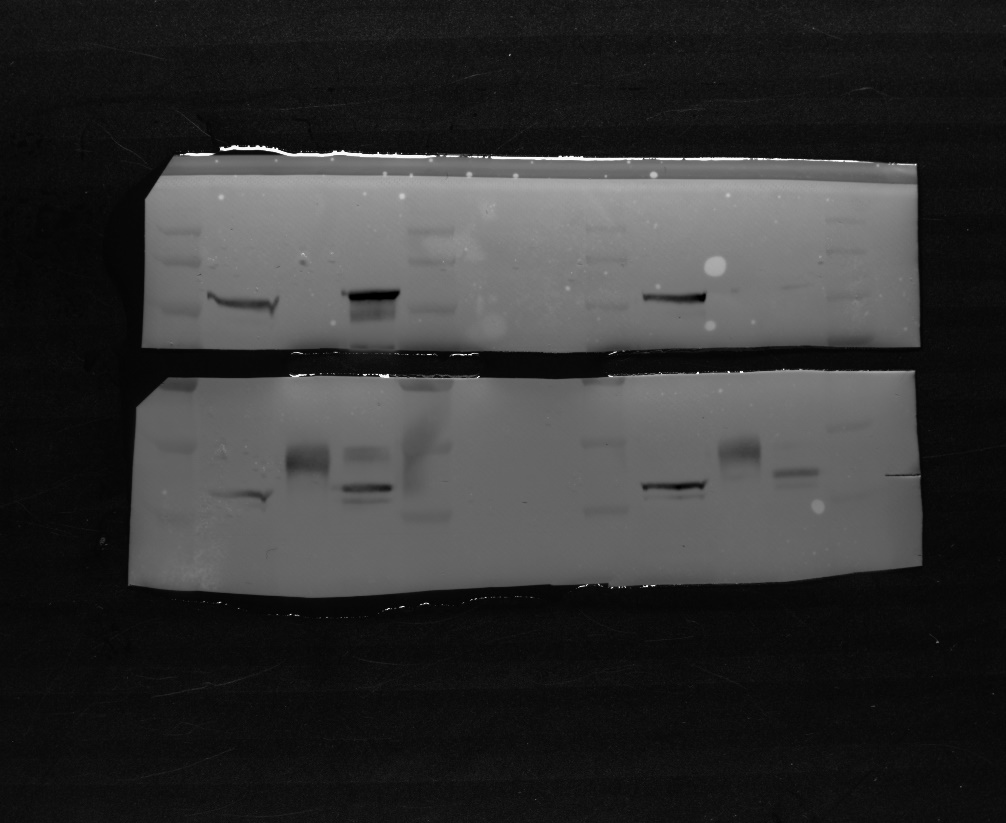
**Merged with marker**

**Anti-YTHDC1**

**Anti-hnRNPG**

**Input**

**IP:YTHDC1**

**IP:IgG**

**Arrow indicates Rabbit IgG**

**Input**

**IP:hnRNPG**

**IP:IgG**

**100kDa**

**45kDa**
