# Supplementary material for: Nuclear m6A reader YTHDC1 promotes muscle stem cell activation/proliferation by regulating mRNA splicing and nuclear export
Source: eLife. 2023 Mar 9;12:e82703. doi: 10.7554/eLife.82703 (PMC10089659; doi:10.7554/eLife.82703)
Supplement: Figure 1—source data 1. — (FPKM) of m6A regulators during satellite cell (SC) lineage progression. [file elife-82703-fig1-data1.xlsx]

## Sheet: Sheet1
RNA-seq(FPKM)
		QSC	FISC	ASC-24h	ASC-48h	ASC-72h
Writer	Mettl3	13.71	7.42	18.82	18.12	16.67
	Mettl14	5.31	2.09	12.21	15.57	12.43
	Ctrlap	22.63	15.53	30.65	35.28	29.69
	Rbm15	1.59	8.12	5.99	6.91	4.49
	Rbm15b	7.84	30.06	33.07	31.45	20.14
	Zc3h13	21.48	5.19	16.62	16.42	15.7
	HAKAI	4.22	4.33	7.04	7.31	6.01
Reader	hnRNPG	41.91	15.86	35.05	40.87	31.44
	Ythdc1	39.09	82.55	27.73	33.69	32.69
	Ythdc2	4.46	2.7	3.07	3.45	3.6
	Ythdf1	17.57	36.19	40.04	42.53	31.64
	Ythdf2	9.21	14.48	21.74	26.35	17.99
	Ythdf3	16.57	15.46	19.85	25.68	31.7
	Hnrnpa2b1	194.44	310.07	410.18	411.56	360.1
	Hnrnpc	48.87	118.41	155.42	176.9	151.02
	Igf2bp1	0.01	0.02	0.15	0.04	0.1
	Igf2bp2	0.15	25.83	3.11	2.31	5.22
	Igf2bp3	0.34	0.29	0.26	0.38	0.44
	Fmr1	11.99	14.69	18.48	28.5	23.92
Eraser	Fto	22.99	17.92	23.25	21.11	28.39
	Alkbh5	12.62	15.25	25.34	24.93	26.66
