# Supplementary material for: Nuclear m6A reader YTHDC1 promotes muscle stem cell activation/proliferation by regulating mRNA splicing and nuclear export
Source: eLife. 2023 Mar 9;12:e82703. doi: 10.7554/eLife.82703 (PMC10089659; doi:10.7554/eLife.82703)
Supplement: Supplementary file 6. [file elife-82703-supp6.xlsx]

## Sheet: cas9 oligo targeting YTHDC1
Supplementary Table S6. Sequenes of oligos used in the study.
sgRNA for targetting YTHDC1 exon1
	Aneal two oligos for insertion to px458 plasmid
DC1-cas9AID-N-1	CACCGacctttctcctcccggctgt	20bp targetting sequence
DC1-cas9AID-N-2	AAACacagccgggaggagaaaggtC

## Sheet: Primers-splicing verification 
Supplementary Table S6.Sequenes of oligos used in the study.
PCR primers for RT-PCR verification of altered YTHDC1 splicing targets
Itgb3bp-F	agaacaggagcacagaaacg
Itgb3bp-R	tcaagttgtctgttgccctc
Nek1-ex15-F	ggttcctgaaggctgagcag
Nek1-ex15-R	cttctgctcttagccgctgc
Nek1-ex19-F	gctgtagagagagccaacca
Nek1-ex19-R	ttctcaccacgaagtttggc
lrp8-F	gccctgctatgtatgagtgg
lrp8-R	actgaactccatgaggcacg
Palb2-F	gccaaaagagctgagaaggc
Palb2-R	tctcctggtggaacagtgag
Scn5a-F	gcagtggctgagtcagacac
Scn5a-R	tcagtgaagcagtcctctgg

## Sheet: siRNA
Supplementary Table S6. Sequences of oligos used in the study.
siRNA sequence for knocking down hnRNPG
siRNA-hnRNPG-1	GCUCUUUAUUGGUGGGCUUTT
siRNA-hnRNPG-2	GCAGCUCACGUGACGGAUATT

## Sheet: qPCR primers
Supplementary Table S6. Sequences of oligos used in the study.
qPCR primers for MeRIP-qPCR and RIP-qPCR
mMalat1_F	TTTGCATTGGACTTGAGCTG
mMalat1_R	TGGCTCCTCAGTCCTTCCTA
m-ythdf2-qpcr-f	ggttctgtgcatcaaaaggatgg
m-ythdf2-qpcr-r	ccaaagaataggaaaagccaatgg
m-ythdf3-qpcr-f	caagtgcagtctcaacagcca
m-ythdf3-qpcr-r	cagcactggatgcacctct
m-Pi4kb-qpcr-f	cagttctcggtggacagcatca
m-Pi4kb-qpcr-r	ggtctcgtttgaaggctgtagg
