# Supplementary figures and images for: Nuclear m6A reader YTHDC1 promotes muscle stem cell activation/proliferation by regulating mRNA splicing and nuclear export
Source: eLife journal article supplement (doi:10.7554/elife.82703), 2023-03-09

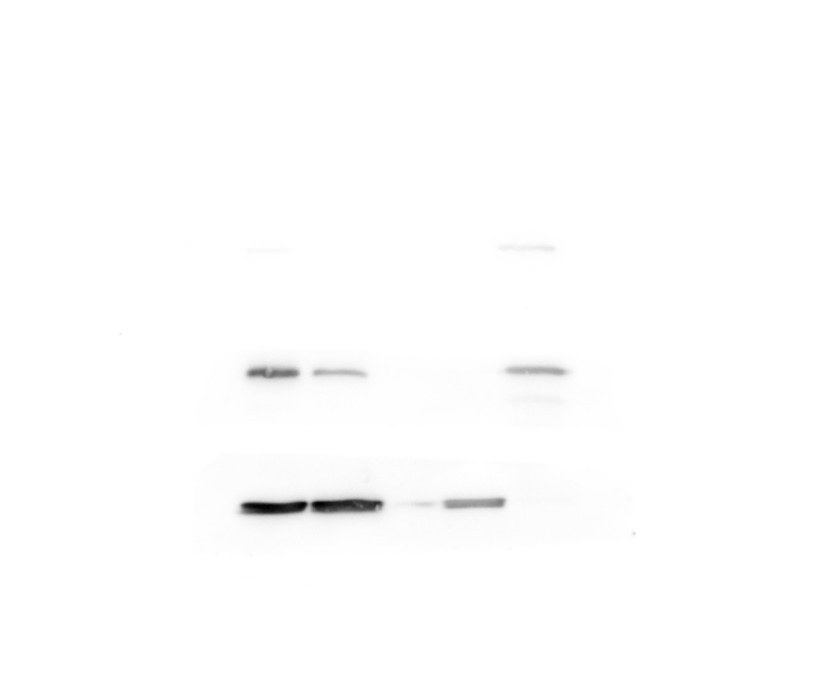
Figure 2C-Hisonte H3

**15kDa**

**Histone H3**

**Ctrl iKO**

**Ctrl iKO**

**Histone H3**


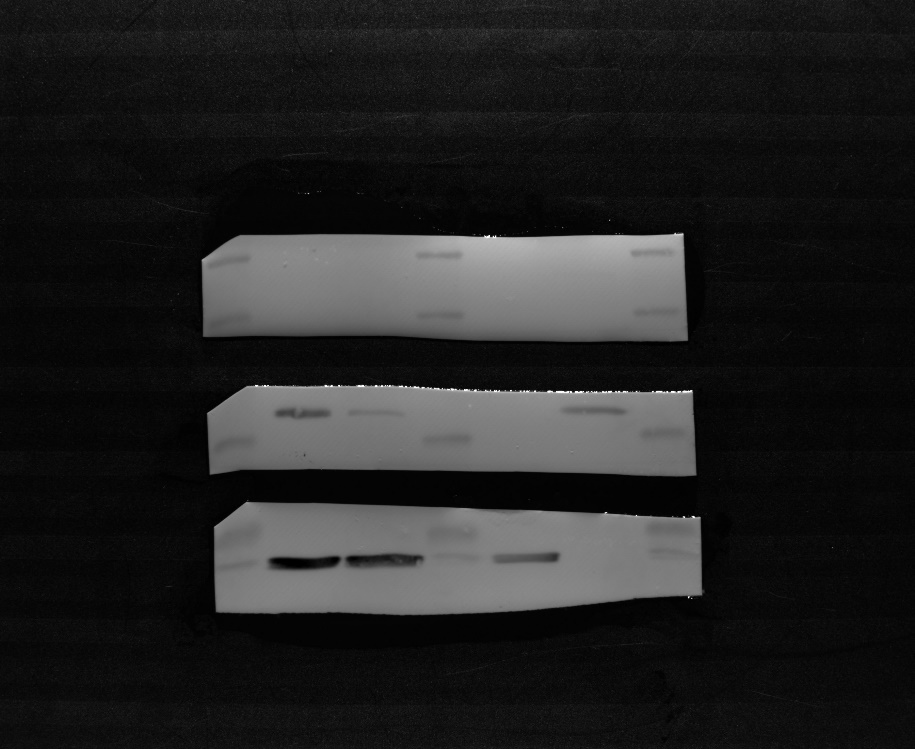


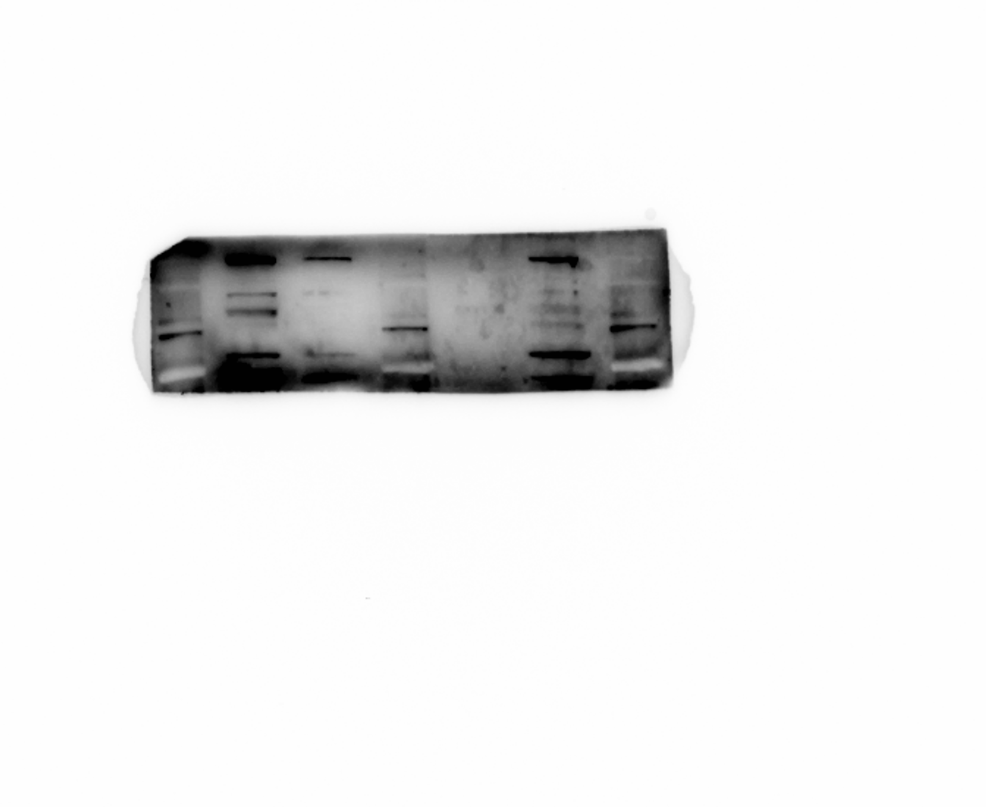
Figure 2C-YTHDC1

**100kDa**

**YTHDC1**

**Ctrl iKO**

Supplement: fig2-data1 [file Figure 2C-with all relevant bands labelled.docx]

DMSO

IAA

WT

W429A

Mutant

IAA


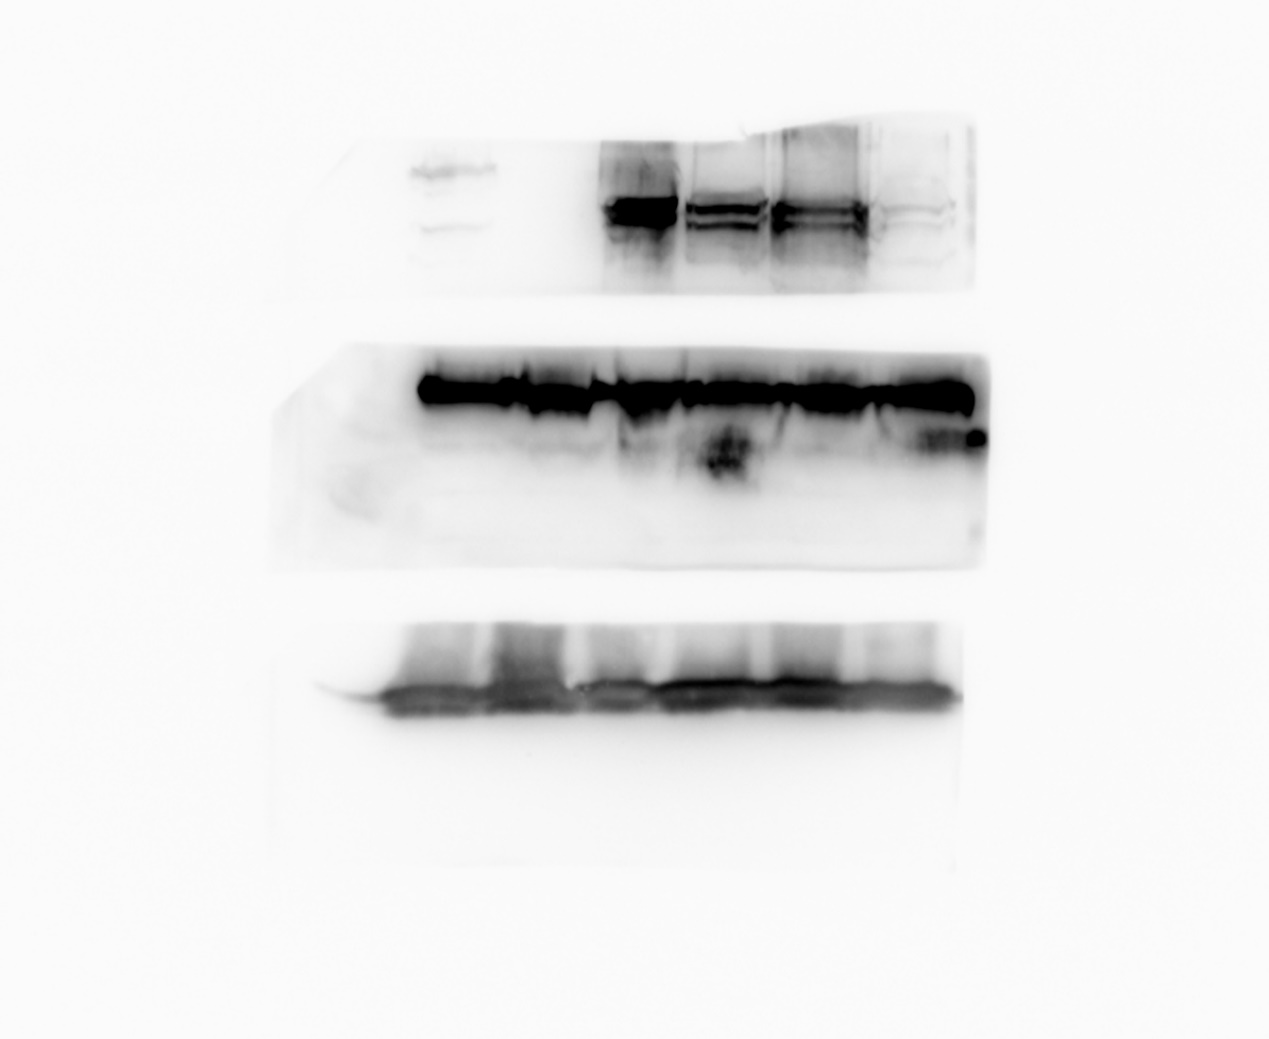


**100kDa**

**YTHDC1**


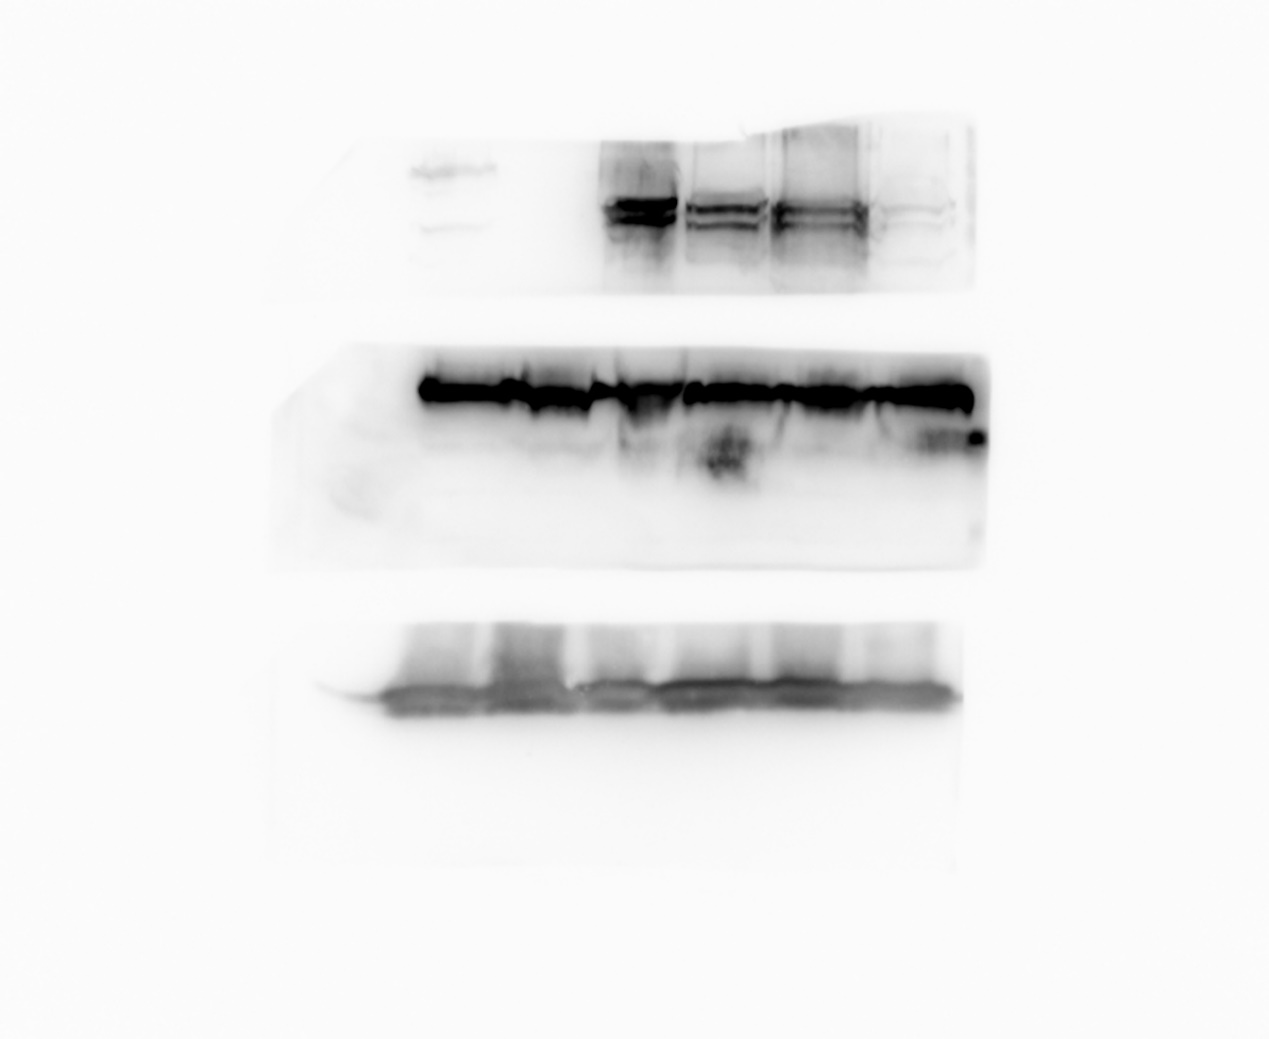


DMSO

IAA

WT

W429A

Mutant

IAA

**GAPDH**

**35kDa**

Supplement: fig3-figsupp1-data1 [file Figure 3-supplement-1I-with all relevant bands labelled.docx]

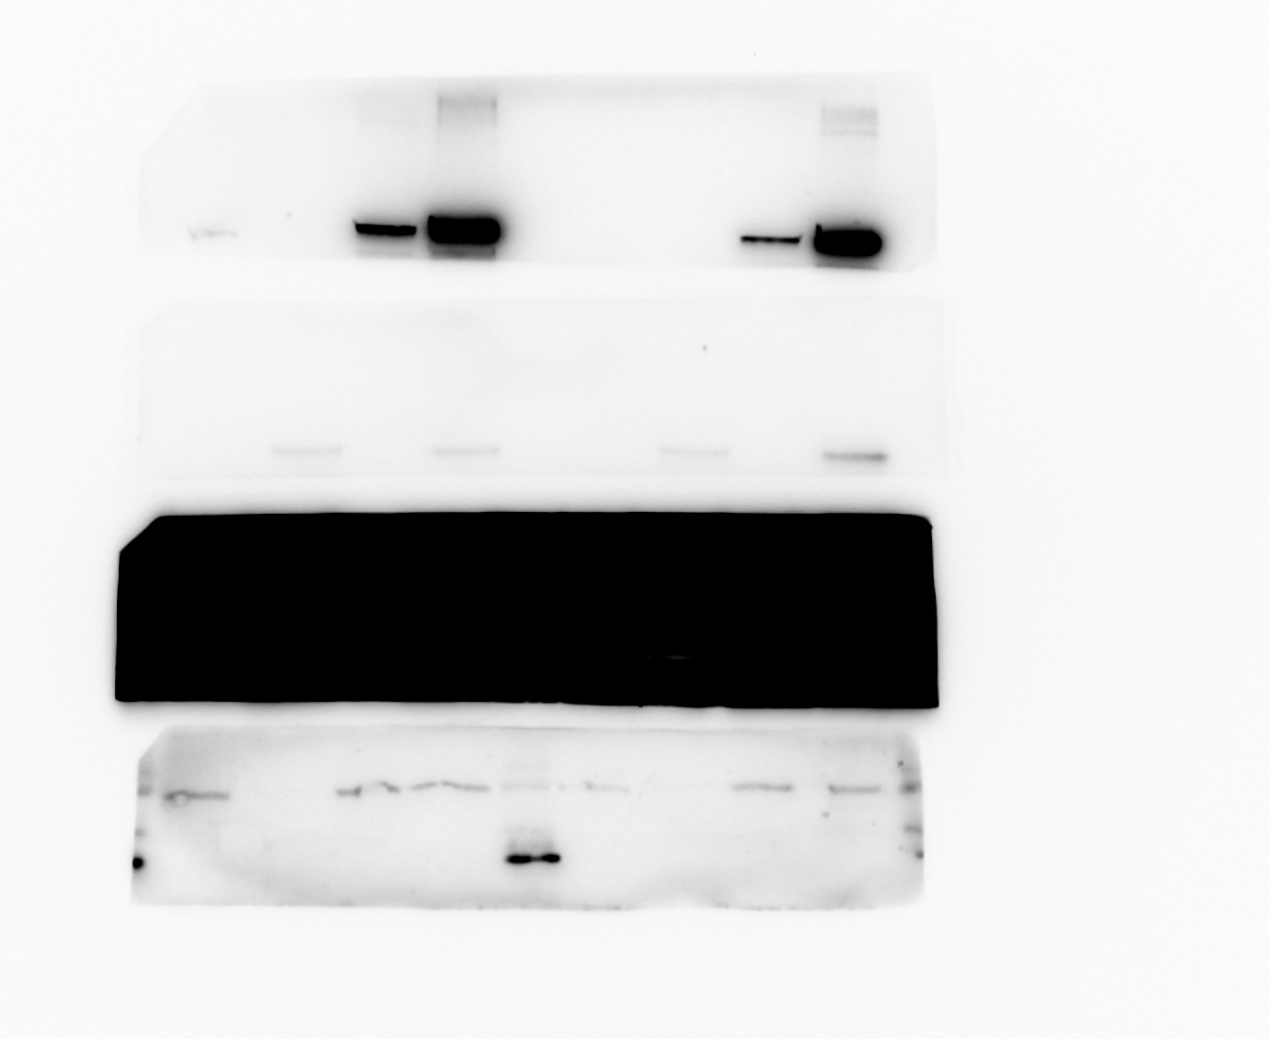

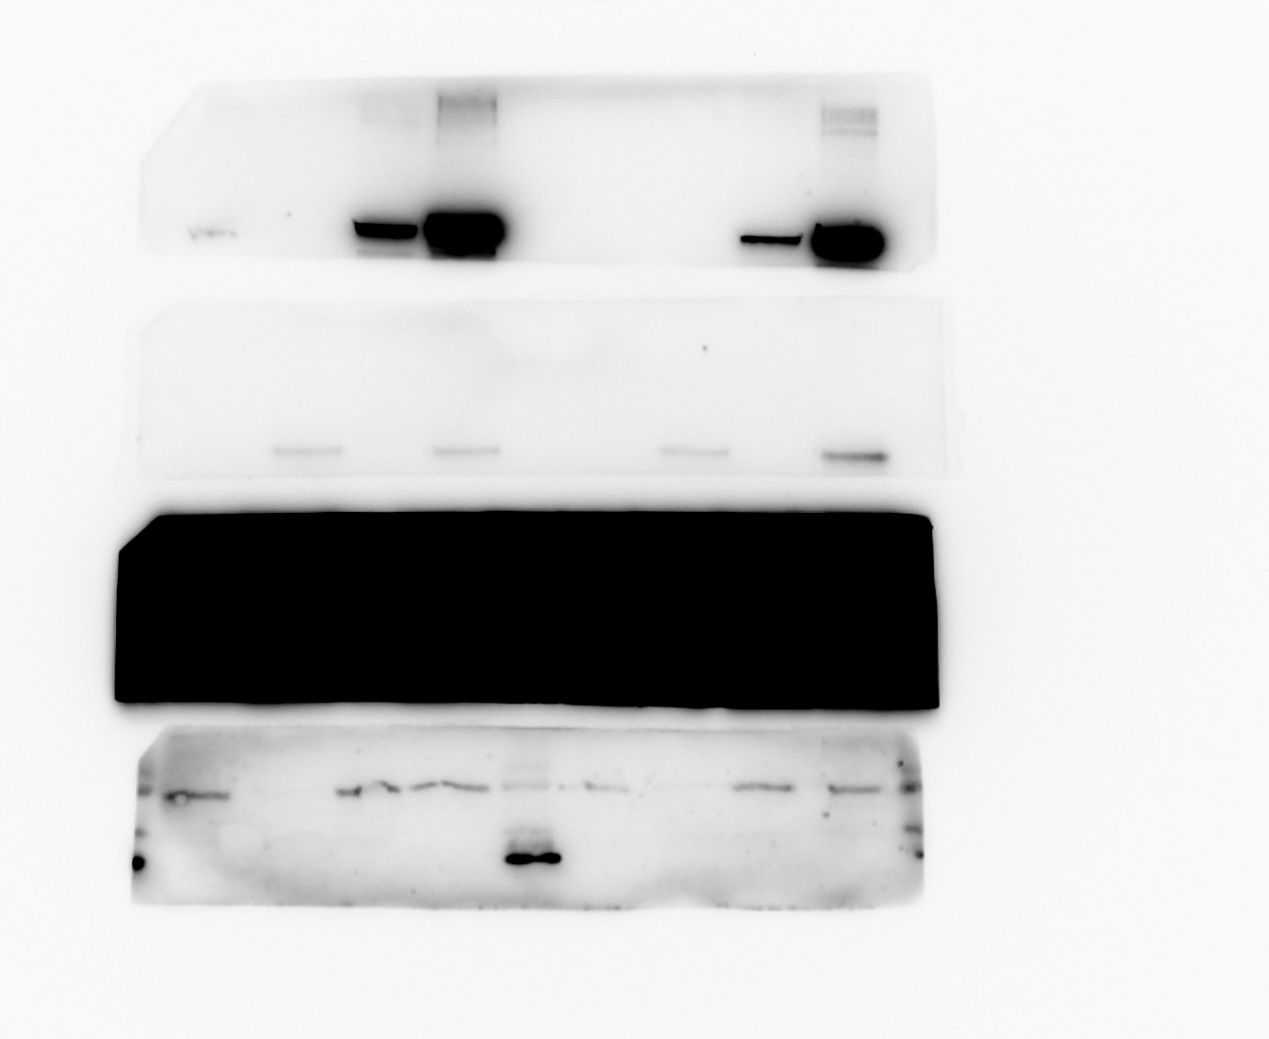


**25kDa**

**100kDa**

Input

IP:Flag

Input

IP:Flag

Input

IP:Flag

IP:Flag

Input

**THOC7**

**YTHDC1**

Supplement: fig7-data3 [file Figure 7L-with all relevant bands labelled.docx]
